# Supplementary material for: Targeting Chk1 in p53-deficient triple-negative breast cancer is therapeutically beneficial in human-in-mouse tumor models
Source: JCI journal article supplement (doi:10.1172/jci58765), 2012-03-26

**Supplemental Figure 1. Clustering of HIM models with their human tumor counterparts and a panel of tumors representing all breast cancer subtypes.** The array tree denotes overall gene expression similarities after unsupervised hierarchical clustering using all probes. The letter represents the passage number of WU-BC3, WU-BC4, and WU-BC5 (A, passage 1; B, passage 2; C, passage 3; D, passage 4; E, passage 5). An ovarian metastasis from a mouse harboring WU-BC5 was included, as well as the human counterparts (Hu) of WU-BC4 and WU-BC5.

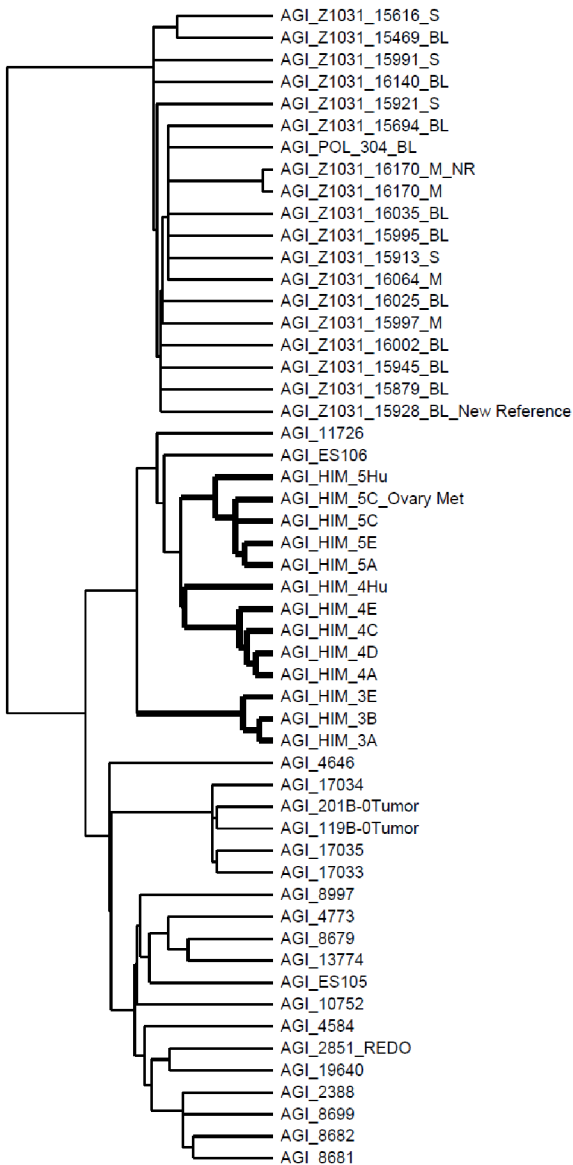

**Supplemental Figure 2. Comparison of tumor cell growth rate for WU-BC3, WU-BC4 and WU-BC5.**  $1 \times 10^6$  cells from either BC3, 4 or 5 were engrafted into humanized mammary fat pads of NODSCID mice. Tumor dimensions were measured every 3-4 days and tumor volumes were calculated. Arrow indicates the time at which treatment commenced.

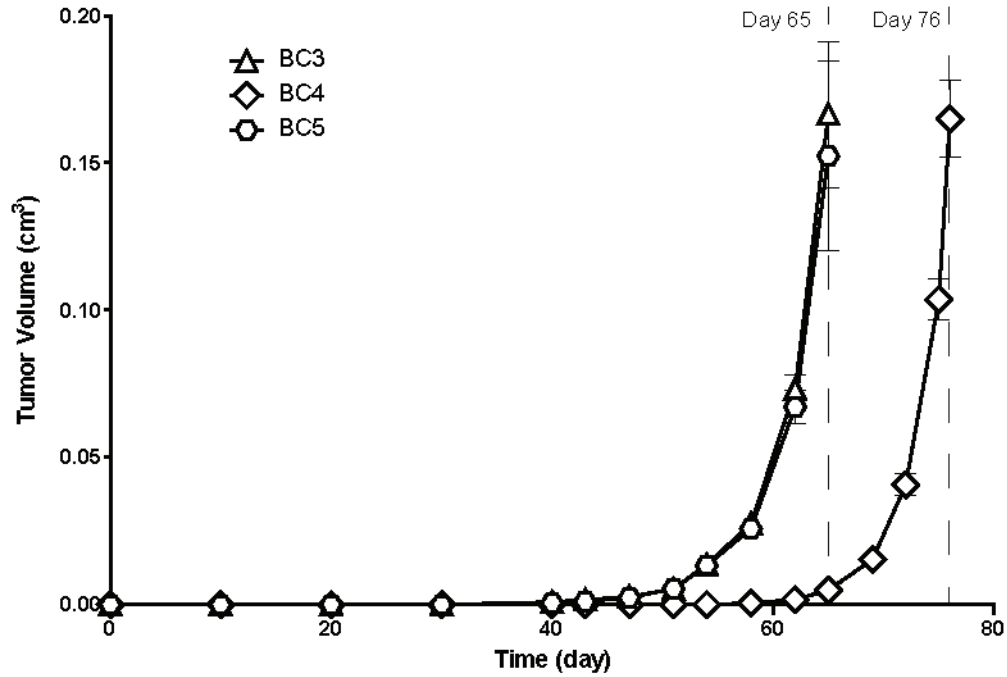

**Supplemental Figure 3. AZD7762 in combination with carboplatin or gemcitabine induces apoptosis in p53 knockdown cells.** BC3-p53WT and BC3-p53KD cells were treated with carboplatin or gemcitabine alone or in combination with AZD7762 and analyzed as described for irinotecan in Figure 7C.

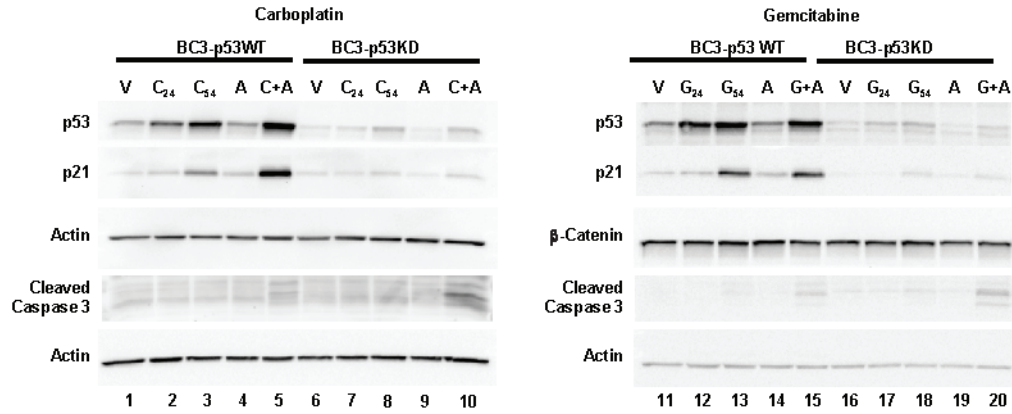

Supplement: sd1 [file 1]
